# Supplementary material for: Technical note: A fast and objective autosampler for direct vapor equilibration isotope measurements
Source: Copernicus journal article supplement (doi:10.5194/egusphere-2024-528), 2024-02-23
Supplement: Supplementary file 1 [file egusphere-2024-528-supplement.pdf]

All supplements can be found on the GitLab of the University of Freiburg:  
<https://gitlab.rz.uni-freiburg.de/hydrology/vapausa>
