# Supplementary material for: Technical note: A fast and objective autosampler for direct vapor equilibration isotope measurements
Source: Copernicus journal article supplement (doi:10.5194/egusphere-2024-528), 2024-02-23
Supplement: Supplementary file [file egusphere-2024-528-AC1-supplement.pdf]

## **Authors' responses to the comments of reviewer#1**

We appreciate your review and comments on our manuscript, "Technical note: A fast and objective autosampler for direct vapor equilibration isotope measurements". Your feedback is valuable to us, and we will make the recommended revisions accordingly. We provide detailed responses to each of your comments below.

### Section 1: General Comments:

The developed automated sampling apparatus is a valuable improvement to the DVE methodology as it increases sample throughput in turn potentially limiting storage impacts on isotope ratio measurements. The possibility of decreased in-lab labour will also be of benefit to labs with large sample throughput needs. This apparatus is a valuable addition to the field and its open source design principles using (mostly) market available components is to be commended. The inclusion of the script GUI\_Picarro.py (in the supplemental repository "Software/Scripts/") for users of Piccaro CRDS which, is also of great use to users of that analysis approach given the increase in objectivity of measurement it can provide as well as providing the impetus to openly report on measurement parameters, even without the VapAuSa hardware.

Overall, I suggest mostly minor revisions regarding the use of appropriate terminology, the addition of citations for some strong statements contained in the manuscript which currently lack needed support, and some improvements to clarity. There are a few more pressing questions regarding testing for memory effects which need to be addressed. This concise manuscript provides a valuable new technology for users of DVE-CRDS and is appropriate for publication in HESS given the improvements I suggest in the specific comments below.

My review of the supplemental material containing the list of materials, technical drawings, circuit diagram, code, and manuals, necessary for building the VapAuSa" was cursory given my familiarity with some of the file types but the repository appeared to contain all of the required materials and information needed to construct the apparatus. I must admit the construction of such an apparatus falls outside of my expertise so I cannot be fully certain of any missing components, but the repository is well organized and in concert with the figures in the paper looks to provide an excellent starting point for one wishing to replicate this technical note's apparatus. With the exception of my minor specific comments below the design section of the manuscript clearly details the apparatus, its construction, and function of its components.

### Section 2: Specific Comments:

1. Throughout the manuscript the authors use the term 'stable water isotopes' while this is a common shorthand, it is incorrect. There are no isotopes of water (molecules do not have isotopes), rather there are isotopes of atoms, or elements (hydrogen, oxygen, nitrogen and so on). The phrase 'stable isotopes of hydrogen and oxygen', is more precise (and correct). To quote Zachary Sharp's 2017 text Principles of Stable Isotope Geochemistry:

“ Writing about 'water isotopes' may sound short and concise, but it is wrong. Just as petrologists don't talk about 'rock isotopes', so hydrologists should avoid talking about 'water isotopes'”

Table 2.1 in that text is an excellent resource for correcting often misused terminology. I suggest that the authors review that table and make corrections throughout their manuscript regarding the use of a number of terminological inconsistencies. Some of those issues are noted under this comment:

Introduction first sentence: Same stable water isotopes language issue referenced in comment 1, followed by the symbols for isotope ratios. It would be good to standardize the language throughout the manuscript in regard to isotopes vs isotope vs isotopic vs isotope ratios, and so on. From Zachary Sharps 2017 book:

“2.2.1 'Isotope' vs. 'Isotopic' These two words appear to be used randomly and interchangeably because the proper use of one or the other is not immediately clear. My mentor Jim O'Neil, was confronted with this dilemma as a U.S.G.S. employee. He consulted the Technical Reports Unit at the USGS for guidance. After some research, it was decided that 'isotope' is used when modified and 'isotopic' is used as a stand-alone adjective. One therefore should write “The oxygen isotope composition of . . .” and “The isotopic composition of . . .”. In the first case, 'oxygen' modifies 'isotope' and in the second 'isotopic' stands alone”

If using the symbols for isotope ratios  $\delta^{18}\text{O}$  and  $\delta^2\text{H}$ , I would modify the first sentence to say: “Stable isotope ratios ( $\delta^{18}\text{O}$  and  $\delta^2\text{H}$ ) have found . . .”. Alternatively, one could say “Stable isotopes of hydrogen and oxygen ( $^2\text{H}, ^1\text{H}, ^{18}\text{O}, ^{16}\text{O}$ ) have found . . .”, though I would lean towards the first.

Line 130-134: The authors use commonly applied shorthand's that are carry overs from oral communication: 'Heavy, and light water' in this case. I again refer the authours to Table 2.1 in Zachary Sharp's 2017 text in regard to more precise terminology:

“ As numbers,  $\delta$  -values can be high or low, positive or negative, but not heavy or light”(Sharp 2017 pg 2-3),

However, that said, I know what you mean when you say 'heavy or light isotope values', as do most other folks in our field, so I would leave the decision regarding this use of this terminology in the hands of the Editor, but I think we should strive to be as precise as possible with our language. I suggest the authors check for and address this issue throughout.

Line 165:Terminology issue: depleted signature and enriched signature, use precise terminology per above.

[Thank you for recommending that book! We will change the wording to your and Sharps book suggestions.](#)

2. Introduction paragraph 2 line ~30 “While most isotope analyzers...” I am confused by the meaning of this sentence. You seem to be saying two things here. First that isotope analyzers are not made for vapour analysis (?), and second that extraction of water from plants or soils is not possible (?)...but you then go on to describe existing extraction methods. Your first statement is not wholly correct as many isotopic analysis systems are built to analyse vapour or liquid samples. Some IRMS methods use vapour equilibration (CO<sub>2</sub> and H<sub>2</sub> equilibration) and both OA-ICOS and CRDS systems have vapour analysis modes (though not all of them do, especially older models). Are you trying to say that there is not an in-line isotope analysis systems which combines extraction and analysis? Because if that is the case, there is the Picaro induction module which is a peripheral system affixed to a CRDS analyzer that heats samples and inject the water vapour directly into the analyzer. I suggest this sentence be revised to improve clarity of meaning and to represent existing methodologies more accurately.

We were trying to say that extraction or equilibration is needed for soil- and plant samples. We will clarify this in the revision.

3. Line 30 &31: Do you have a citation (or other data) which concretely indicates the popularity of CVD and DVE? And the rise in popularity of DVE?

We do not and therefore will exclude this sentence.

4. Line 35-47: This paragraph is leaning heavily on Grahler et al 2021. I suggest attributing the operating methodology described here to some of the original developers (Wassenaar, Hendry, Barbour, Pratt, etc). The use of silicone blot is an excellent idea though this is the first I've encountered it which is to say again a citation showing the introduction of this component would be useful (unless of course you are the progenitors of this technique). I have also seen a loop system used during DVE analysis where after inserting the needle and tubing to the sample bag for the inlet side connection to an OA-ICOS, a second connection is made with a needle and tubing connected to the analyzers outflow port (See Gaj et al 2019 DOI: 2136/vzj2018.04.0083). The latter technique allows for a continuous looping of the vapour sample through the analysis chamber and more stable readings.

We will give more credit to the original developers.

Regarding the silicone, this was also described by Grahler et al 2021.

The Idea with looping the air is a great idea for implementing the autosampler to OA-ICOS, however this would double the materials (like valves, valveblocks, etc.) needed. For CRDS, the air volume in the bag is totally sufficient to reach stability, therefore for now we will keep the setup as is.

5. Line 49-50: I don't find this statement to be entirely accurate. The Garvelmann study used 8 cm long soil cores (relatively large depending on water content) and the Wassenaar study used water volumes in both soil samples and liquid water samples around 20 ml. There are two main types of CVD. A larger glass and manifold style system like West et al 2006 (DOI: 10.1002/rcm.2456) or Orłowski et al 2013 (DOI:10.5194/jsss-2-179-2013), and a small capillary

and vial systems described in Koeniger et al 2011(DOI: 10.1002/rcm.5198) and Millar et al 2018 and 2019 (DOI: 1002/rcm.8530). The Koeniger-style CVD system uses samples volume much smaller than would be required for DVE and in some cases depending on water content the sample volumes used in the larger West/Orlowski-style CVD system may be smaller than required for DVE. Sample size is contingent upon water content. Wassenaar 2008 discuss the required water content needed to limit any atmospheric effects. Hendry et al 2015 (Doi: DOI: 10.5194/hess-19-4427-2015) make mention of issues related to low water content. The Hendry study noting >5% GWC is needed for accurate measurement. In my experience with the DVE system, sample volumes need to be larger than I have used for both types of CVD method (again water content dependant). My main concern with the author's statement is that by saying "... small sample volume" they don't account for water volume requirements. I would change the language to exclude the use of 'small' and instead indicate that DVE can use sample volumes similar to those used in CVD depending on pre-extraction testing of water contents. This is important to not obfuscate that fact that in some cases relatively large sample volumes of soil or plant material could be required. The second part of this statement is accurate though: one of the great parts of DVE is that it can allow for high spatio-temporal resolution.

[Thank you for the change suggestion. We will fix it, but also omit the paragraphs regarding CVD to focus more on DVE-LS.](#)

6. Line 55-56: The end of this sentence is not accurate. The research by Nehemy et al 2019 does not involve correction of isotopic data generated by DVE-LS as impacted by co-extracted VOCs. That research (and their follow up work in Millar et al 2021 (1002/rcm.9118)) were focused on developing a method for detecting spectral interference during DVE-LS analysis since a tool for detection of spectral contamination during vapour analyses for OA-ICOS did not yet exist. They do not suggest a correction approach using their detection method. Revisions here are needed to correct for the inaccuracy of attributing the Nehemy et al reference with creating isotopic data correction techniques for spectrally contaminated samples.

[We will change the sentence to more accurately represent the findings of Nehemy et al 2019.](#)

7. Line 59: Yes, I agree! The lack of standardization is a major issue across many aspects of ecohydrological study. The need for improvements in standardization of methods has been previously discussed in Ceperly et al 2024 (DOI: 10.1002/wat2.1727) and in Millar et al 2022 (DOI: 10.1002/hyp.14698).

[Thank you!](#)

8. Line 70: Regarding the use of ambient air for flushing and memory effect. I see below that you used a drying canister during air flushing testing but found no improvements to your data. Our laboratory uses drierite canisters in between analysis of each sample to lower the analysis chamber water contents and to limit any issues related to memory effects. I am curious if during your testing you discovered any issues related to memory effects or if you did any testing to check for memory effects, given the use of ambient air for flushing? Did you run each sample more than once, or stagger your samples so that waters with different isotope values were ran in

an intermixed fashion? I would be concerned about any impacts from water in the ambient atmospheric air used during flushing given humidity levels can change drastically throughout a day, which may impact your measurements or contribute to some memory effects. I would also like to know if you tested for memory effects. The IAEA WICO survey from Wassetnaar et al 2021 (DOI: 10.1002/rcm.9193) indicated that some of the best performing laboratories were those that carried out multiple injections per sample keeping only the latter readings as a means of dealing with memory effect. The WICO tests were for liquid analyses, but the issue of memory effect is still relevant here, especially with such a high sample throughput!

We did not test for memory effect, but since the laboratory is climatized to a constant temperature, we do not expect larger intra-day humidity differences.

However to counteract memory effects, we did analyse the samples in a random sequence, with flushing periods in between and long analysis times until all our defined stability criteria were met.

Regarding the WICO tests, they were performed using liquid samples. With our DVE-LS bags, gas volume is limited, so therefore multiple measurements are not possible.

9. Line 84: 391 samples! Wow! An incredible improvement on daily sample throughput. This is great.

Thank you!

10. Line 106: Beginning “Within an active sequence...”. I am slightly confused about the flushing sequence. If I am understanding this sentence and the preceding set up explanation, the CRDS is drawing air into its analysis chamber from the open ambient air flushing valve though the valve block to flush out any potential water, with the H<sub>2</sub>O value being measured in the CRDS analysis chamber yes? Or is there another sensor in the valve block which measures the customizable H<sub>2</sub>O value? This needs clarification and is perhaps contradicting your discussion section 4.5 “Don’t buy Cheap” which indicates that ambient air can cause measurement errors. Please clarify this. Second, when you say customizable H<sub>2</sub>O value, as user of such systems I am aware of this water values function (indicates the water content in the analysis chamber), but it may be worth adding a short sentence explaining what the H<sub>2</sub>O value is for non-expert users.

We will clarify that we only look at the H<sub>2</sub>O values given by the CRDS within its analysis chamber. We will also clarify the “Don't buy cheap” section; the issue is not about initially some mixing with ambient air, but about a continuous leaking-in.

11. Line 127-128: How was airtight vapour flow ensured? If a specialized check was used here (beyond the use of the silicone blots), it bears mentioning so others may attempt to replicate this.

We did not implement any specialized check, we will clarify that this assumption is based on using proper materials which are individually rated airtight.

12. Line 170: As a counterpoint to the statement about accuracy vs measurement repeatability. Its bears noting that one can only present accuracy data if they have a know truth value to

compare the subsequent measurements against. In cases where water to water extractions are carried out, truth values can be collected and accuracy assessed. However, if a study is using plant material, or soils, (and not carrying out a spiking experiment with all its well discussed issues Gaj et al 2017, Thielman 2019, Oerter et al 2014 etc. all reviewed in Millar et al 2022), a truth value may not exist and so repeatability is the only option is to present uncertainty and error. Wassenaar et al 2021 (Doi: 1002/rcm.9193) discuss the standards of error propagation calculations that we should all aspire to.

Knowing the “true value” is a real issue. In the revision we will go more into detail with measurement repeatability by applying standard deviation for the identical samples, as well as calculating the measurement bias (average difference of measurement to true value) for the whole system. This should produce a more robust statistical assessment.

13. Line 176: on your new systems accuracy: Your accuracies fit within the ranges described for other DVE publications in Table 2 in Millar et al 2022 which looks to have added new publications for vegetation extraction and new methods from what was first shown in Springer et al 2015. Allen and Kirchner 2022 (DOI: 10.1002/hyp.14483) discuss the issue of accuracy/error and range of end members, while lower accuracy is not always desirable, high throughput has a benefit and, in some cases, depending on end member range it may not be a huge issue if the error is 7‰ for  $\delta^2\text{H}$  for example.

Yes, we think higher throughput can sometimes also be a worthy trade-off to accuracy, as long as it is within acceptable limits.

14. Line 180: The Orlowski study used zip-top plastic bags as opposed to the new standards set by Grahler: (aluminum laminated with plastic coffee-style bags) and discussed through a lens of diffusion rates in Millar et al 2022). I expect the cost of these aluminum bags, while higher than standard market available resealable zip-top bags, are still lower than the cost of the consumable glassware, and liquid nitrogen utilized in the CVD approach. Are there any newer citations which also discuss cost and time of set up given Grahler’s findings on appropriate bags? If no citation exists can the authors discuss briefly a cost comparison from their own use of such systems?

We will try to give a cost comparison in the revision. Compared to the labour cost of manual analysis, the consumable-material cost is nearly negligible for DVE-LS.

15. Line 183: The automation of this process will be a boon to users of the DVE-CRDS system! If only it existed for OA-ICOS as well.

The project is open-source, maybe someone can adapt it!

16. Comments for Section 4.3 on storage time:

Line 186: “Uncertainty might cancel out due to lower sample storage time”. This kind of speculation is not useful without data to back up it up. It is hopeful to say that may be the case but as scientists we do not rely on might or could be. I would revise this sentence or provide data/ citations which support it.

We will include a comparison of storage induced and autosampler induced uncertainty.

Line 187: "Over time these changes appear with every..." Do you have a citation for this? Such a statement requires one. I know that some users heat seal their Al-Plastic bags as opposed to using the zip-top. Is there any data on leaks from heat sealed bags?

We gave a citation to that statement, the drifts can be found in Gralher et al., 2021. They also compared heat sealed and only zip-locked bags. We will add some more information here.

Issue continued in line 190: Again scientist should not assume, they should provide data or citations which confirm their reasoning. Research has been carried out assessing temperature effects on isotopic drift. Millar et al 2022 thoroughly review storage material effects and temperature effect of the isotope values of stored samples. I suggest the authors review the references detailed in that work instead of making assumptions regarding freezer storage as some research had already been done regarding this issue.

Thank you for the paper suggestion, we will incorporate it.

17. Section 4.4 On objectivity. This is very good. The field need more transparent reporting of all parameters applied during extractions. Extraction parameters should be reported in all publications using them.

Thank you!

18. Line 200: The statement regarding operator body heat seems speculative, but I could be wrong. Do the authors have data or citations to support this?

We will clarify this in the revision.

19. Section 4.5 Don't buy cheap: Mentions that even a small amount of ambient air leaking into the system can cause errors during vapour analysis. But this contradicts the use of ambient air to flush their system. Given my comments above regarding clarification of the ambient air flushing system, if ambient air is not in fact pulled into the measurement chamber during flushing, then this is not a contradiction. Clarification is needed above so the readers are fully certain that ambient air is not being pulled into the measurement cavity during flushing of the block. However, if ambient air is pulled in the measurement chamber during flushing, then this section is contradictory to the above design. Please clarify.

As stated above, we will change the wording and explain the differences between permanent leakage and flushing.

20. Line 217: The authors should not suggest use of cheap plastic bags in their conclusion. Gralher's research on appropriate materials for sample storage and analysis during DVE-LS seems conclusive as does the discussions in Millar et al 2022 indicating that zip-top plastic bags are not appropriate for use with DVE-LS. The addition of this statement in the conclusion does not take into account the fact that some samples collected in zip-top bags may undergo periods of storage or require transport (time) which increase evaporative fractionation risks. Introducing this idea in the conclusion is not appropriate but should they wish to make this point it should

be expanded upon in the discussion and the leak risk compared against other already published studies which indicate these types of bags are not appropriate.

We will discard this point.

### Section 3: Technical Corrections:

1. Language correction: In abstract ~ line 5: “However, sample analysis requires a significant manual labor, thereby limiting the number of samples that can be analyzed.”. Remove the ‘a’ between ‘requires’ and ‘significant’.

We will change this.

2. Language correction: Introduction paragraph 2 line ~30 “While most isotope analyzers are build...” should be ‘built’ not ‘build’.

We will change this.

3. Introduction paragraph 2. I think the structure of this paragraph could be reworked to improve readability. You begin with a confusing statement which is not accurate depending on your meaning (discussed in my comments above), briefly mention DVE, then immediately change topic to discussing CVD and how it works. The paragraph ends and the next takes up the discussion of DVE. I understand that you may want to mention the popularity of DVE and CVD together, but I find this disjointed.

We will discard CVD from the introduction.

4. Line 49: “Additionally on a small sample...” space required between volume and similar

We will change this.

5. Line 30-31: DVE-LS is only partially defined. I know that LS = laser spectroscopy but other readers may not, so the acronym needs to be fully defined.

We will clarify the abbreviation.

6. Line 74: Language issue for sentence: “For 23 sample bags are connected with cannulas to the valves through 1/8 inch PTFE tubing”. The use of ‘For’ at the start of sentence is incorrect or something is missing later in the sentence. Depending on desired meaning ‘For’ could be removed, simply saying “23 sample bags can be connected via cannulae to...”

We will change this.
